# Supplementary material
Source: PubMed Central journal article supplement (PMC4854367)
Supplement: jgv-97-4-941-s001.pdf [file jgv-97-4-941-s001.pdf]

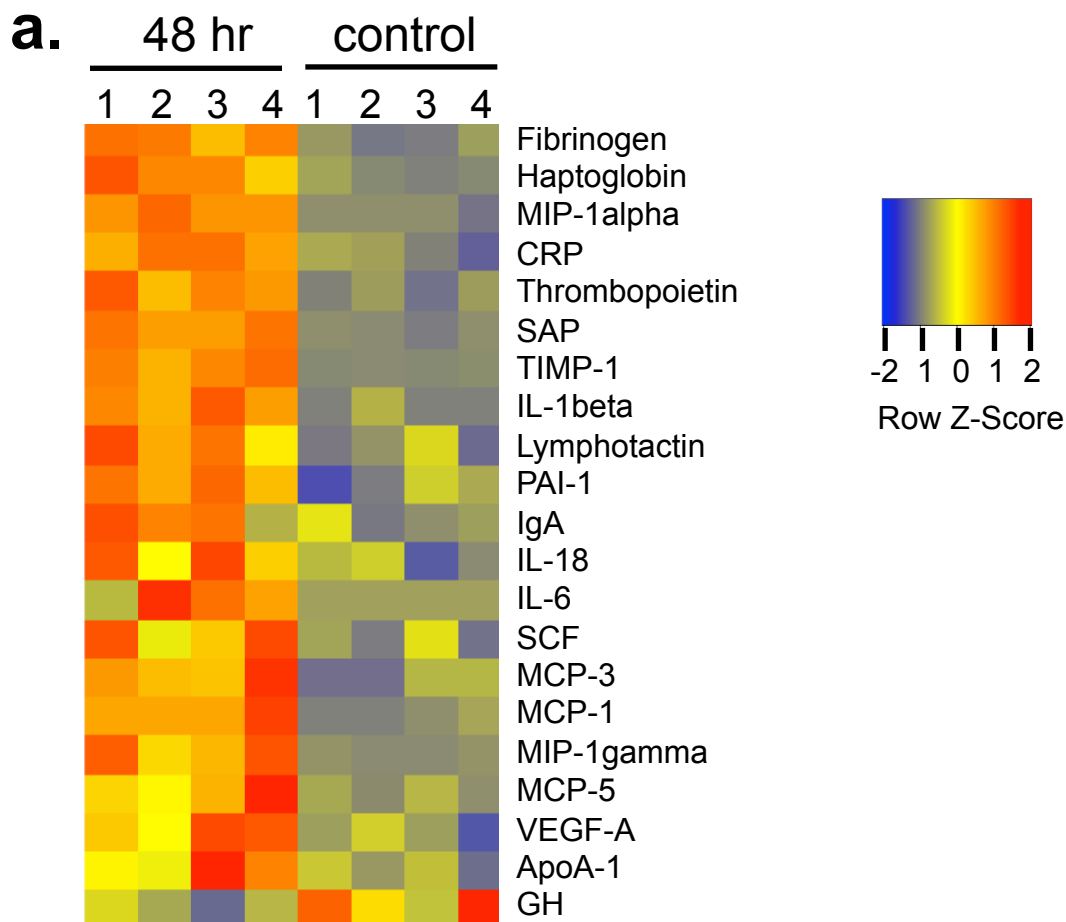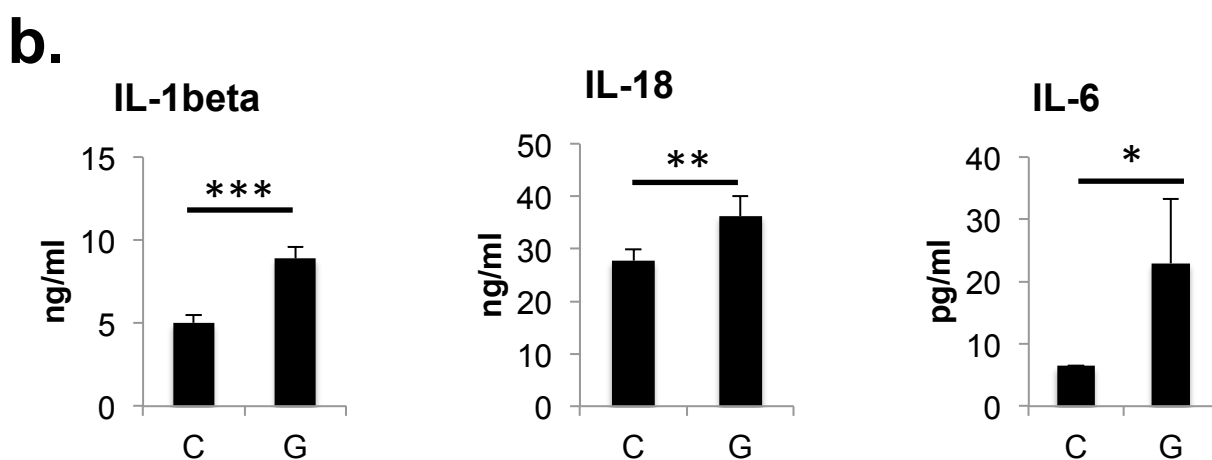

**Fig. S1.** **a.** Heat map of differentially regulated plasma proteins in control and recipient mice at 48 hr after transplant. N=4/group. **b.** Graphical representation of the plasma protein values of selected cytokines. Results are expressed as the mean plus standard deviation. \*\*\*,  $p < 0.001$ , \*\*,  $p < 0.01$ , \*,  $p < 0.05$ .
